# Supplementary material for: Facile fabrication of polypyrrole nanotubes using reverse microemulsion polymerizationElectronic supplementary information (ESI) available: FTIR spectrum and TEM images of PPy nanotubes. See http://www.rsc.org/suppdata/cc/b2/b211716a/
Source: Royal Society of Chemistry journal article supplement (doi:10.1039/b211716a), 2003-02-12

Supplementary Information for:

## Facile fabrication of polypyrrole nanotubes using reverse microemulsion polymerization

Jyongsik Jang\*, Hyeonseok Yoon

*Hyperstructured Organic Materials Research Center and School of Chemical Engineering,  
Seoul National University, Shinlimdong 56-1, Seoul 151-742, Korea.*

1. FT-IR spectrum of polypyrrole nanotubes prepared with 9 g of AOT, 1 mL of aqueous  $\text{FeCl}_3$  solution, and 0.5 g of pyrrole monomer in 40 mL of hexane at room temperature.

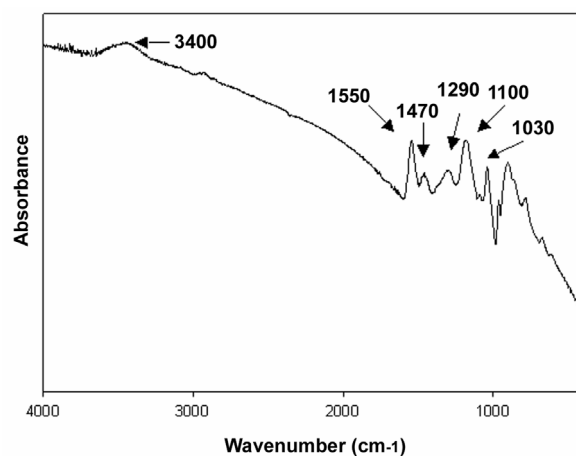

FT-IR spectrum shows the featureless rise in the absorbance at energies above  $1600\text{ cm}^{-1}$ . This is expected because the absorbance in this region arises from the free charge carriers present in doped material.

# Supplementary Material (ESI) for Chemical Communications  
# This journal is © The Royal Society of Chemistry 2003

2. TEM image of PPy nanotubes prepared with 9 g of AOT, 0.5 mL of aqueous FeCl<sub>3</sub> solution (9.0 M), and 0.5g of pyrrole monomer in 40 mL of hexane at room temperature.

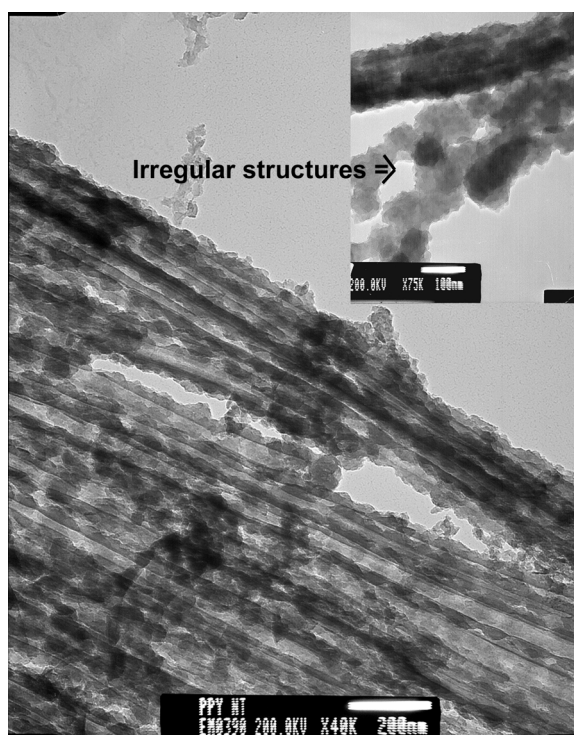

# Supplementary Material (ESI) for Chemical Communications  
# This journal is © The Royal Society of Chemistry 2003

3. TEM image of PPy nanotubes prepared with 7 g of AOT, 1 mL of aqueous FeCl<sub>3</sub> solution (9.0 M), and 0.5g of pyrrole monomer in 40 mL of hexane at room temperature.

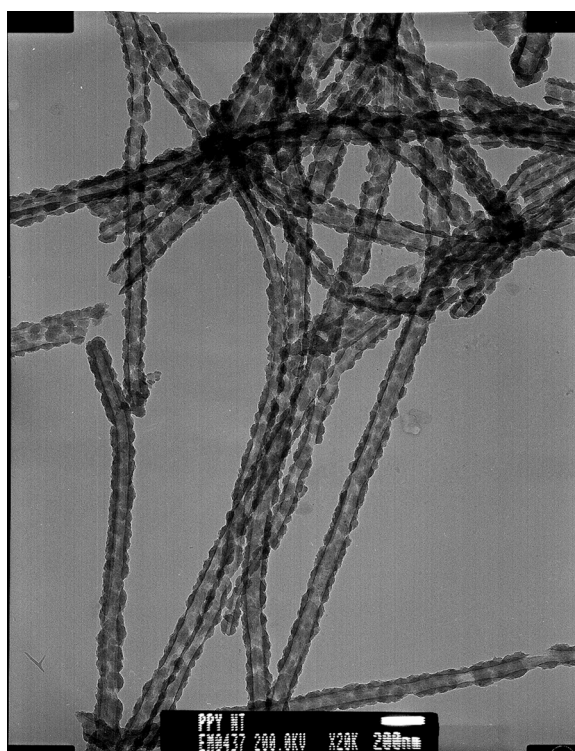

Supplement: b211716a.pdf [file b211716a.pdf]
